# Multimodal deep learning enhances diagnostic precision in left ventricular hypertrophy

Jessica Torres Soto<sup>1</sup>, J. Weston Hughes<sup>2</sup>, Pablo Amador Sanchez<sup>3</sup>, Marco Perez<sup>3</sup>, David Ouyang<sup>4,5</sup>, Euan Ashley<sup>3</sup>

1. Department of Biomedical Data Science, Stanford University

2. Department of Computer Science, Stanford University

3. Department of Medicine, Division of Cardiology, Stanford University

4. Department of Cardiology, Smidt Heart Institute, Cedars-Sinai Medical Center

5. Division of Artificial Intelligence in Medicine, Department of Medicine, Cedars-Sinai Medical Center

Correspondence: [euang@stanford.edu](mailto:euang@stanford.edu)

## Abstract

Determining the etiology of left ventricular hypertrophy (LVH) can be challenging due to the similarity in clinical presentation and cardiac morphological features of diverse causes of disease. In particular, distinguishing individuals with hypertrophic cardiomyopathy (HCM) from the much larger set of individuals with manifest or occult hypertension (HTN) is of major importance for family screening and the prevention of sudden death. We hypothesized that deep learning based joint interpretation of 12 lead electrocardiograms and echocardiogram videos could augment physician interpretation. We chose not to train on proximate data labels such as physician over-reads of ECGs or echocardiograms but instead took advantage of electronic health record derived clinical blood pressure measurements and diagnostic consensus (often including molecular testing) among physicians in an HCM center of excellence. Using over 18,000 combined instances of electrocardiograms and echocardiograms from 2,728 patients, we developed LVH-Fusion. On held-out test data, LVH-Fusion achieved an F1-score of 0.71 in predicting HCM, and 0.96 in predicting HTN. In head-to-head comparison with human readers LVH-Fusion had higher sensitivity and specificity rates than its human counterparts. Finally, we use explainability techniques to investigate local and global features that positively and negatively impact LVH-Fusion prediction estimates providing confirmation from unsupervised

31 analysis the diagnostic power of lateral T wave inversion on the ECG and proximal septal  
32 hypertrophy on the echocardiogram for HCM. In conclusion, these results show that deep  
33 learning can provide effective physician augmentation in the face of a common diagnostic  
34 dilemma with far reaching implications for the prevention of sudden cardiac death.

35

## 36 Introduction

37

38 Hypertrophic cardiomyopathy (HCM) is the most common cardiac genetic disease with an  
39 estimated prevalence in the general population of 1:500 to 1:200.<sup>1</sup> HCM is an autosomal  
40 dominant mendelian disease that can be associated with significant morbidity in the form of heart  
41 failure and sudden death.<sup>2</sup> Thus, identifying patients with HCM has significance well beyond the  
42 individual, with many proband diagnoses leading to screening of several generations of a family.  
43 Diagnosis of HCM can be difficult due to the high prevalence of manifest hypertension in the  
44 general population, present in up to 45% of US adults<sup>3</sup> (this before counting the occult disease).  
45 Thus, a common diagnostic dilemma for clinicians when faced with LVH on the ECG or  
46 echocardiogram is how to rule out HCM. In a small study, the rates of misclassification of HCM  
47 were as high as 30% percent with hypertension being the most common misdiagnosis<sup>4</sup>. Although  
48 the American Heart Association provides guidelines for the diagnosis of hypertension and HCM  
49 separately, distinguishing between them is a task that most physicians feel ill equipped to  
50 perform (understandably as HCM is a rare disease not commonly encountered even in general  
51 cardiology practice). This provides an opportunity for physician augmentation through artificial  
52 intelligence (AI).

53

54 New advances in artificial intelligence have led to rapid expansion of medical deep learning  
55 applications with an emphasis on medical specialties that hold a high degree of visual pattern  
56 recognition tasks like radiology, pathology, ophthalmology, dermatology and most notably  
57 cardiology.<sup>5</sup> Imaging and electrical phenotypes of hypertrophic cardiomyopathy<sup>6,7</sup> are the first  
58 line clinical tools.

59

60 Interpretation of the ECG relies on direct visual assessment making it ideal for deep learning  
61 approaches. Previous work has demonstrated that demographic and medical data can be learned  
62 including detection of low ejection fraction, something typically requiring echocardiography to  
63 confirm<sup>8-11</sup>. Our prior work using video computation of echocardiograms has demonstrated  
64 efficient detection of left ventricular hypertrophy and the identification of a broad range of  
65 cardiovascular disease.<sup>12,13</sup>

66  
67 Combining data sources as human diagnosticians do, has the potential to provide an artificial  
68 intelligence (AI) algorithm with greater diagnostic power<sup>14</sup>. We focus here on the two most  
69 frequent diagnostic modalities in cardiology. To date, no published work has explored the  
70 benefits of a multimodal deep learning model using electrocardiogram and echocardiogram data,  
71 although there has been some exploration of combining separately trained diagnostic models in a  
72 single pipeline<sup>15</sup>. We hypothesize that multimodal deep learning may provide added benefit in  
73 distinguishing patterns that are not easily discernible from individual modalities. We present  
74 LVH-fusion, the first model to jointly model electrical and ultrasound-based time series data of  
75 the heart. We demonstrate its potential with application to the diagnosis of left ventricular  
76 hypertrophy.

## 77 Results

78 We developed a multi-modal deep learning framework, LVH-fusion, that takes as input time based  
79 electrical and echocardiographic data of the heart. We applied this framework in a common clinical  
80 challenge: the determination of the etiology of left ventricular hypertrophy. Motivated by prior work on  
81 deep learning applied to electrocardiogram signals and echocardiogram videos<sup>9,13,16</sup>, LVH-fusion jointly  
82 models both electrocardiogram and echocardiogram data. It is trained not with proximate human derived  
83 ECG and echocardiogram labels but rather via a gold standard diagnosis independently derived from the  
84 Electronic Health Records (HTN) or through the consensus diagnosis of HCM within a center of  
85 excellence.

86 In this study, both single-modal and multimodal neural network models were examined (Figure 1). Four  
87 different multimodal fusion architectures were explored, combining ECG and echocardiogram  
88 information in different ways. For both late-average fusion and late-ranked fusion models, decision level

89 fusion was used to combine the outputs of electrocardiogram and echocardiogram classifiers<sup>17</sup>. In the late-  
90 average fusion model, soft voting is performed by computing the average probability for each class from  
91 the individual ECG and echocardiogram classifiers and predicts the class with maximal average  
92 probability. In the late-ranked fusion model, the probabilities for each class from the individual ECG and  
93 echocardiogram classifiers are ranked and a prediction is determined from the highest ranked probability.  
94 For the late fusion models, both pre-trained and random, the learned feature representations from each  
95 modality were concatenated together before the final classification layer. In this situation the fusion  
96 model considers both inputs and during training and the loss is calculated jointly. We explored the  
97 benefits of randomly initialized weights and pretrained weights in the late fusion model. Lastly, the single  
98 modal models provide a benchmark against which to compare multimodal models that jointly consider the  
99 paired electrocardiogram and echocardiogram data, demonstrating the benefit of a combined approach.

#### 100 Data Acquisition and selection

101 With the approval of Stanford Institutional Review Board (IRB), we retrieved electrocardiograms and  
102 echocardiograms from patients between 2006 and 2018 at Stanford Medicine (Table 1). The data was split  
103 into training, validation, and test sets with no patient overlap between sets. Due to the fact that multiple  
104 electrocardiograms and echocardiograms are present within the healthcare system record, we explored  
105 various data selection scenarios to understand what selection methods are best suited for this specific task.  
106 The quantitative comparison of all data selection used can be found in Supplementary Table S1. The final  
107 model was trained using a patient's first ECG and first echocardiogram in the system.

#### 108 Model performance

109 Four multimodal fusion models were explored: late-average, late-ranked, pre-trained late fusion  
110 and random late fusion (Figure 1). The performance metrics of each model is detailed in Table 2.  
111 The late average model achieved the highest F1-score and specificity rates 0.711 (0.571 - 0.826)  
112 and 0.952 (0.921 - 0.979) respectively on the held-out test set. We conducted experiments to  
113 study the performance of single-modal models trained on only ECG and echo to demonstrate the  
114 benefit of multimodal models. The multimodal models outperform single-modal model F1-  
115 scores, which increase from 0.63 to 0.71. Furthermore, the false-discovery rates are significantly  
116 reduced from 0.45 to 0.3. To provide context for these results, we also trained the single-modal  
117 models to predict left ventricular etiology using standard quantitative features from the  
118 electrocardiogram. This baseline model achieved sensitivity rates of 0.51 for predicting HCM  
119 which is considerably lower than LVH-Fusion (Supplementary Table S2). These results show

120 that the proposed electrocardiogram signals model discover novel characteristics not accounted  
121 for with the quantitative features. Lastly, to examine the discriminatory power of our  
122 methodology, we performed a sensitivity analysis for predicting LVH etiology including the  
123 additional classification task of “normal.” In this context, LVH-fusion maintains high  
124 discriminatory power in predicting LVH from normal ECG and echocardiogram videos,  
125 suggesting that false positive rates of hypertension or hypertrophic cardiomyopathy would be  
126 low if the model was extended to this use case (Supplementary Table S3 and S4).

127

#### 128 Understanding model performance

129 In order to improve our understanding of how LVH-Fusion classifies left ventricular etiology, we  
130 implemented a series of ablation studies similar to Hughes et al. 2021<sup>18</sup> to determine what  
131 information models rely on to make predictions. For electrocardiogram single-modal models we  
132 examined the impact of varying the number of leads from the standard 12 leads to 8 leads and  
133 masking each lead to understand the impact each lead holds for prediction estimates. We find  
134 that although no single lead harbors a statistically significant impact on the overall model  
135 performance, masking out lead V3 and aVR had the highest negative impact on prediction  
136 estimates, Figure 2. Next, since the standard 12 lead ECG contains 8 algebraically independent  
137 leads, we considered the impact of masking multiple leads combinations. We observe an overall  
138 reduction in classification metrics when masking multiple leads at a time with no significant  
139 difference between masking the 4 dependent leads (III, aVL, aVF, aVR) and a random  
140 subselection of 4 leads, Supplementary Figure S2. These results suggest our model benefits from  
141 the complete 12 lead input and classification metrics are negatively impacted with any  
142 nonspecific reduction in leads.

143

144 For the echocardiogram single-modal model, we examined segmentation, restricting the  
145 prediction algorithm to i) only the region around the left ventricle, ii) random single frames, and  
146 iii) single end diastolic frames. Restricting the echocardiogram model to the area around the left  
147 ventricle caused a decrease in accuracy, showing the model relies on information outside of that  
148 region to make classifications. This is interesting given the focus of clinicians on the left  
149 ventricle when considering LVH, even despite the fact that hypertension could impact the left

150 atrium by causing restriction and HCM affects all four chambers. Restricting the model's input  
151 to a single frame further decreases accuracy, demonstrating that motion information is important  
152 in distinguishing between HCM and hypertension. Figure 2 details the performance of each  
153 ablation experiment.

154

#### 155 Model interpretations

156 In order to improve our understanding of how LVH-Fusion classifies left ventricular etiology, we  
157 implemented SHAP GradientExplainer, a game theory approach to explain the output of a  
158 machine learning algorithm<sup>19</sup>. Relating this method to the ECG model, this approach takes the  
159 prediction of a model and estimates the gradient with respect to each individual timestep for  
160 every lead from the input signal. For echocardiogram videos, an analogous methodology applies:  
161 the gradient of the model's prediction was calculated with respect to every pixel from the input  
162 video. In each case, the calculated value is then compared to a provided background distribution,  
163 the training data. The value of the calculated gradients for each timestep/pixel is then assigned an  
164 importance score such that highly impactful scores (denoted in red) hold positive impacts on  
165 prediction estimates. Values with low importance scores negatively influence prediction  
166 estimates (denoted in blue).

167

168 We emphasize samples of ECG and echocardiograms from the test partition to deduce regions  
169 the model found most impactful to prediction estimates, Figure 3 and 4. In Figure 3, the ECG  
170 interpretation results highlight an overall focus on V3 and T-wave inversion in leads V1-V6.  
171 Both the observed early R wave progression and T-wave inversion are indications of HCM.  
172 Summarized local interpretations for each lead provides explanations of the overall impact each  
173 lead has on prediction estimates. Additional examples of ECG interpretation tracings can be  
174 found in the Supplement Figure S1. Comparably, the interpretation results of the echocardiogram  
175 videos, Figure 4, clearly depicts asymmetric proximal septal thickness, a hallmark distinction of  
176 HCM across all frames of the video. Next, to examine local summary interpretations, we  
177 segmented the left ventricle on each frame for duration of a video's length. This allowed us to  
178 quantitatively compare the positive and negative impacts the estimated LV size had on overall  
179 prediction estimates, Supplemental Figure S3.

180

181 To further examine if the regions of importance identified in distinct samples are globally similar  
182 across all predictions, a summation or averaging across all local instances was performed. This  
183 approach provides a highly compressed, global insight into the model's behavior. We considered  
184 per lead contributions to predictions in ECGs and left ventricular segmentation in  
185 echocardiogram videos. Global summary results for ECG corroborates our results from the  
186 ablation studies, lead V3 and aVR holds valuable information for model's prediction estimates,  
187 Supplement Figure S4.

188 Comparison against physician interpretation

189 We had two expert readers review ECG tracings and echocardiogram videos and asked them to  
190 make a diagnosis of HTN or HCM. We selected 45 samples (40 HTN and 5 HCM) from the test  
191 set to compare LVH-fusion. The LVH-fusion model outperformed these expert cardiologists  
192 (one of whom has 20 years of experience in diagnosing HCM). LVH-fusion correctly classified 3  
193 out of the 5 ECG and echocardiogram HCM samples. Variability between cardiologists varied  
194 greatly, with one cardiologist matching LVH-fusion sensitivity estimates but with a reduction in  
195 specificity, while cardiologist two failed to correctly classify any of the HCM ECG samples  
196 provided.

## 197 Discussion

198 In this study, we report the first multimodal (ECG and echocardiogram based) deep learning  
199 model in clinical cardiology and use it to predict the etiology of left ventricular hypertrophy.  
200 Combining complementary knowledge from multiple modalities can improve diagnostic  
201 performance in clinical practice. The trained model demonstrates high discriminatory ability in  
202 distinguishing hypertrophic cardiomyopathy from hypertension with an AUC of 0.91, AUPRC of  
203 0.78. Furthermore, ablation studies provided independent support from unsupervised analysis for  
204 clinicians' focus on ECG lateral repolarization and echocardiographic proximal septal  
205 hypertrophy for the diagnosis of HCM. Combining complementary information from multiple  
206 modalities is intuitively appealing for improving the performance of learning-based approaches.  
207 Our results can be directly applied in general medical and cardiology clinics where exposure to  
208 rare conditions such as HCM limits confidence in human diagnostic prediction alone.

209  
210 Deep learning models specifically focused on single modalities in cardiology have shown  
211 impressive results for arrhythmia detection, age, and other clinical actionable insights<sup>8,10,16</sup>.  
212 Previously Ko et al., focused on using convolutional neural networks (CNN) for ECG  
213 interpretation with respect to HCM<sup>22</sup>. They showed high discriminatory power in classifying  
214 HCM against a background population of left ventricular hypertrophy by ECG alone. However,  
215 approximately 28-30% of HCM cases had concurrent hypertension, inhibiting a direct  
216 comparison of possible distinction between HCM and hypertension. To date, deep learning  
217 research addressing non-pulmonary hypertension detection using electrocardiogram or  
218 echocardiogram was unknown. One previous approach successfully used both ECG and  
219 echocardiogram data individually with a stepwise approach to diagnosis of cardiac  
220 amyloidosis<sup>15</sup>, whereas here we focus on fusion method applications of multi-modal deep  
221 learning of electrocardiograms and echocardiograms together.

222  
223 Medical decision making is complex, often relying on a combination of physician's judgment,  
224 experience, diagnostic and screening test results, and longitudinal follow-up. In the case of a  
225 patient presenting with anything other than severe, grossly asymmetric LVH, suspicion for HCM  
226 would be higher for patients who do not obviously have hypertension. However, occult  
227 hypertension is common and challenging to rule out and with mild “gray zone” hypertrophy, it is  
228 not uncommon to make this assumption. Similarly, for patients who present with LVH and  
229 manifest hypertension, the question is always “is hypertension alone enough to explain this  
230 degree of LVH?” Given the implications of missing a diagnosis of HCM—a mendelian disease  
231 associated with heart failure and sudden death—most generalists do not feel confident ignoring  
232 the possibility of HCM. In these cases, aggressively treating hypertension and re-reviewing the  
233 patient can help but challenges in follow up, adherence, and effectiveness of therapy make the  
234 window of equipoise long. These are the clinical scenarios into which LVH-fusion will have the  
235 most benefit. Yet, this is merely the first application of the approach. A similar approach to the  
236 identification of other causes of LVH such as Fabry disease or cardiac amyloidosis can be  
237 applied using similar “gold standard” diagnostic labels to those we use here. The future of deep  
238 learning in medicine is a move beyond reproducing human derived label features to capitalizing



239 on unsupervised machine learned features vs a gold standard diagnostic or prognostic label. This  
240 will allow machine augmentation of the human led diagnostic journey.

241  
242 In summary, we develop a deep learning model incorporating ECG and echocardiogram time  
243 series data and apply it to help identify hypertrophic cardiomyopathy patients from within the  
244 much larger group of patients presenting with LVH due to hypertension or unknown causes. We  
245 present various well known fusion methods of combining data streams from multiple modalities  
246 and compare these comprehensively to single-modal models. Further studies should explore the  
247 real-world application of physician augmentation approaches like LVH-fusion in medical  
248 practice.

## 249 Methods

250 Data acquisition and study population

251 Hypertrophic cardiomyopathy patients were selected for this study from the Hypertrophic  
252 Cardiomyopathy clinics at the Stanford Center for Inherited Cardiovascular Disease.  
253 Hypertension patients were selected from individuals that were found to be persistently  
254 hypertensive (SBP >150) with at least 5 consecutive systolic blood pressure readings over 150.  
255 Exclusion criteria included any ECG clinical annotations of ventricular-pacing or left bundle  
256 branch block. In addition, we excluded any data from both electrocardiograms and  
257 echocardiograms datasets if the date acquired was after a documented myectomy procedure.  
258

259 We retrieved 15,761 electrocardiograms (ECGs) and 3,234 transthoracic echocardiograms from  
260 2,728 unique individuals at Stanford Health Care, Table 1. Standard 12 lead ECGs were divided  
261 into training, validation, and test partitions based on a unique patient identification number to  
262 ensure that no patient overlap existed across data partitions. Echocardiogram videos from  
263 Stanford Medicine were curated for apical 4-chamber view videos.

264 Data Processing and selection

265 Electrocardiogram signals were filtered to remove any baseline wander and powerline  
266 interference. Normalization of 12 lead ECGs was performed by lead over a random subset of the

267 study sample population, using mean and standard deviation. Echocardiogram videos were  
268 processed in an identical method as Oyuang et al<sup>13</sup>. Given multiple electrocardiograms and  
269 echocardiograms per individual present within our dataset, we examined the effects of different  
270 data selection methods on model training and performance metrics. We selected three different  
271 data selection methods: 1) first clinical presentation for all data partitions, 2) all clinical  
272 presentations in the training partition with only first clinical presentation selected for the  
273 validation and test partitions, and 3) all clinical presentations for all partitions. Extended details  
274 of each selection method can be found in Supplemental Table 1.

275 Overview of model training framework

276 Training for the single-modal and multimodal neural network models were executed  
277 independently.

278 Models were trained using a two-stage grid search approach to find the optimal hyperparameters.  
279 In the initial hyperparameter search, evaluation metrics from the validation set can be found in  
280 the Supplementary Tables S5, S6. The hyperparameters that yielded the best performing models  
281 were selected for additional training and hyperparameter search considering various loss  
282 functions, loss weighting for minority class and minority class oversampling. Final models were  
283 selected from the lowest validation loss.

284 Single-modal model training

285 For electrocardiogram single-modal model training, the following hyperparameters included:  
286 model architecture: {VGG11, VGG13, VGG16, VGG19, densenet169, densenet121,  
287 densenet201, densenet161 resnet18, resnet34, resnet50, resnet101, resnet152, resnext50\_32x4d,  
288 resnext101\_32x8d, wide\_resnet50\_2 wide\_resnet101\_2}; batch size: {32, 64, 75}; Optimizer:  
289 {SGD, adam}, and Hz: {500, 250}. The first hyperparameter search involved training all  
290 combinations of hyperparameters above for 100 epochs and saving results from the epoch with  
291 the lowest loss. Furthermore, we explored a second hyperparameter search which explored class  
292 weighted loss functions, oversampling minority class samples and setting final bias term to the  
293 expected class ratios from top performing models from the initial hyperparameters search. We  
294 examined expanding training to 150 epochs and considering both loss and auPRC results for  
295 selection of the final model. The selected hyperparameters that resulted in best performance on

296 the validation set were the following: resnet 34 model, oversampling minority class, adam optimizer,  
297 batch size of 64, and sampling rate of 500.

298

299 For echocardiogram unimodal model training, the following hyperparameters included: Model  
300 architecture: {r2plus1d\_18, mc3\_18, r3d\_18}, Number of frames: {96, 64, 32, 16, 8, 4, 1};  
301 Period: {2, 4}; Pretrained weights: {True, False}. The first hyperparameter search involved  
302 training all combinations of hyperparameters above for 100 epochs and saving results from the  
303 epoch with the lowest loss. Furthermore, we explored a second hyperparameter search which  
304 explored class weighted loss functions, oversampling minority class samples and setting final  
305 bias term to the expected class ratios from top performing models from the initial  
306 hyperparameters search. We examined expanding training to 300 epochs and considering both  
307 loss and auPRC results for selection of the final model. The selected hyperparameters that  
308 resulted in best performance on the validation set were the following: r2plus1d\_18 model,  
309 pretrained weights, weighted minority class, adam optimizer, batch size of 20, and frames 16 with sampling  
310 period of 4.

311 *Multimodal model training*

312 For multimodal training models, the electrocardiogram and echocardiogram data were paired  
313 according to unique patient identifiers. Data selection for the earliest clinical encounter was  
314 selected for all training, validation and test set partitions; this resulted in a total of 1,414 training,  
315 176 validation, and 168 internal test samples. The detailed characteristics of the dataset can be  
316 found in Table 1. We hypothesized that using the learned weights from the single-modal models  
317 would benefit training so we explored both pre-trained late fusion and random late fusion  
318 models. All multimodal models were trained to 300 epochs and we considered both loss and  
319 auPRC results for selection of the final multimodal model. We implemented LVH-Fusion using  
320 PyTorch on the Stanford University Research cluster, Sherlock. The selected hyperparameters  
321 that resulted in best performance on the validation set were the following: r2plus1d\_18 model +  
322 resnet 34, pretrained weights, weighted minority class, adam optimizer, batch size of 10, and  
323 frames 16 with sampling period of 4.

324 Comparison to feature based models

325 Standard reported features from Tracemaster electrocardiogram machines were extracted for  
326 each ECG considered in this study. We used these features for input into a XGboost model to  
327 determine if a feature-based method would exceed the performance metrics of the unimodal  
328 neural network models. The list of ECG features used were modeled from Kwon et al. 2020<sup>10</sup>.

329 Comparison with normal samples

330 In order to explore how our neural networks, perform on non-left ventricular hypertrophy  
331 individuals, we sampled electrocardiograms with clinical annotations of sinus rhythm and  
332 echocardiograms with a normal ejection fraction greater than 45. We took the best performing  
333 single-modal model and retrained them to include an additional non-LVH class; details of  
334 sample size and performance metrics can be found in Supplementary Table 5 and Supplementary  
335 Table 6, respectively.

336 Ablation experiments

337 To further understand how the neural networks make their predictions, we explored various  
338 ablation studies.

339 We retrained the single-modal echo model with data ablated in the following ways:

- 340 1) a single randomly selected frame of each echo, repeated for the length of the original  
341 video to compare to the best performing unimodal model.
- 342 2) The end diastolic frame from each echo, repeated for the length of the original video to  
343 fairly compare to the best performing unimodal model. The end diastolic frame was  
344 identified by a trained sonographer from EchoNet-dynamic<sup>13</sup>.
- 345 3) Using the estimated left ventricular segmentation from EchoNet-dynamic<sup>13</sup>, we set all  
346 pixels to zero except a segmented box around the left ventricle.

347 For electrocardiogram we retrained the single-modal models for the following experiments:

- 348 1) Using 8 of the 12 leads, to compare to the best performing unimodal model.
- 349 2) Masking out each lead independently to compare to the best performing single-modal  
350 model and understand impacts each lead holds on performance.

351 Echocardiogram models were trained to 300 epochs and electrocardiogram models were trained  
352 for 150 epochs.

353 SHAP Interpretation experiments

354 SHAP GradientExplainer<sup>19</sup> uses an extension of integrated gradient values and SHAP values,  
355 which aims to attribute an importance value to each input feature by integrating the gradients of  
356 all interpolations between a foreground sample (test samples) and a provided background  
357 samples (training data). The importance scores sum up to approximately the difference between  
358 the expected value of all background samples and the individual prediction estimate of interest.  
359 We applied this method to both ECG and echocardiogram models; 1500 samples were used to  
360 build the background distribution for the ECG model and 80 samples were used to build the  
361 background distribution for the echocardiogram model. In both cases, the full test set was used as  
362 foreground samples.

363

364 Data and Code availability

365 All the code for LVH-Fusion will be available at <https://github.com/AshleyLab/lvh-fusion/> after  
366 publication. The data that support the findings of this study are available on request from the  
367 corresponding author upon approval of data sharing committees of the respective institutions.

368

369

## 370 References

- 371 1. Semsarian, C., Ingles, J., Maron, M. S. & Maron, B. J. New perspectives on the prevalence  
372 of hypertrophic cardiomyopathy. *J. Am. Coll. Cardiol.* **65**, 1249–1254 (2015).
- 373 2. Ho, C. Y. *et al.* Genotype and Lifetime Burden of Disease in Hypertrophic Cardiomyopathy:  
374 Insights from the Sarcomeric Human Cardiomyopathy Registry (SHaRe). *Circulation* **138**,  
375 1387–1398 (2018).
- 376 3. Whelton, P. K. *et al.* 2017  
377 ACC/AHA/AAPA/ABC/ACPM/AGS/APhA/ASH/ASPC/NMA/PCNA Guideline for the

- 378 Prevention, Detection, Evaluation, and Management of High Blood Pressure in Adults: A  
379 Report of the American College of Cardiology/American Heart Association Task Force on  
380 Clinical Practice Guidelines. *Hypertension* **71**, e13–e115 (2018).
- 381 4. Magnusson, P., Palm, A., Branden, E. & Mörner, S. Misclassification of hypertrophic  
382 cardiomyopathy: validation of diagnostic codes. *Clin. Epidemiol.* **9**, 403–410 (2017).
- 383 5. Esteva, A. *et al.* Deep learning-enabled medical computer vision. *NPJ Digit Med* **4**, 5  
384 (2021).
- 385 6. Pennacchini, E., Musumeci, M. B., Fierro, S., Francia, P. & Autore, C. Distinguishing  
386 hypertension from hypertrophic cardiomyopathy as a cause of left ventricular hypertrophy.  
387 *J. Clin. Hypertens.* **17**, 239–241 (2015).
- 388 7. Doi, Y. L. *et al.* Echocardiographic differentiation of hypertensive heart disease and  
389 hypertrophic cardiomyopathy. *Br. Heart J.* **44**, 395–400 (1980).
- 390 8. Attia, Z. I. *et al.* Age and Sex Estimation Using Artificial Intelligence From Standard 12-  
391 Lead ECGs. *Circ. Arrhythm. Electrophysiol.* **12**, e007284 (2019).
- 392 9. Hannun, A. Y. *et al.* Cardiologist-level arrhythmia detection and classification in  
393 ambulatory electrocardiograms using a deep neural network. *Nat. Med.* **25**, 65–69 (2019).
- 394 10. Kwon, J.-M. *et al.* A deep learning algorithm to detect anaemia with ECGs: a retrospective,  
395 multicentre study. *Lancet Digit Health* **2**, e358–e367 (2020).
- 396 11. Yao, X. *et al.* Artificial intelligence-enabled electrocardiograms for identification of  
397 patients with low ejection fraction: a pragmatic, randomized clinical trial. *Nature Medicine*  
398 (2021) doi:10.1038/s41591-021-01335-4.
- 399 12. Madani, A., Ong, J. R., Tibrewal, A. & Mofrad, M. R. K. Deep echocardiography: data-  
400 efficient supervised and semi-supervised deep learning towards automated diagnosis of

- 401 cardiac disease. *NPJ Digit Med* **1**, 59 (2018).
- 402 13. Ouyang, D. *et al.* Video-based AI for beat-to-beat assessment of cardiac function. *Nature*  
403 **580**, 252–256 (2020).
- 404 14. Huang, S.-C., Pareek, A., Zamanian, R., Banerjee, I. & Lungren, M. P. Multimodal fusion  
405 with deep neural networks for leveraging CT imaging and electronic health record: a case-  
406 study in pulmonary embolism detection. *Sci. Rep.* **10**, 22147 (2020).
- 407 15. Goto, S. *et al.* Artificial intelligence-enabled fully automated detection of cardiac  
408 amyloidosis using electrocardiograms and echocardiograms. *Nat. Commun.* **12**, 2726 (2021).
- 409 16. Attia, Z. I. *et al.* An artificial intelligence-enabled ECG algorithm for the identification of  
410 patients with atrial fibrillation during sinus rhythm: a retrospective analysis of outcome  
411 prediction. *Lancet* **394**, 861–867 (2019).
- 412 17. Sagi, O. & Rokach, L. Ensemble learning: A survey. *Wiley Interdiscip. Rev. Data Min.*  
413 *Knowl. Discov.* **8**, e1249 (2018).
- 414 18. Hughes, J. W. *et al.* Deep learning prediction of biomarkers from echocardiogram videos.  
415 *bioRxiv* (2021) doi:10.1101/2021.02.03.21251080.
- 416 19. Sundararajan, M., Taly, A. & Yan, Q. Axiomatic attribution for deep networks. *arXiv*  
417 *[cs.LG]* (2017).
- 418 20. Lewington, S. *et al.* Age-specific relevance of usual blood pressure to vascular mortality: a  
419 meta-analysis of individual data for one million adults in 61 prospective studies. *Lancet* **360**,  
420 1903–1913 (2002).
- 421 21. Parato, V. M. *et al.* Echocardiographic diagnosis of the different phenotypes of hypertrophic  
422 cardiomyopathy. *Cardiovasc. Ultrasound* **14**, 30 (2016).
- 423 22. Ko, W.-Y. *et al.* Detection of Hypertrophic Cardiomyopathy Using a Convolutional Neural

424 Network-Enabled Electrocardiogram. *J. Am. Coll. Cardiol.* **75**, 722–733 (2020).

425



426  
427  
428  
429  
430  
431  
432  
433  
434

## FIGURES

### Figure 1. LVH-Fusion study design.

Two disease of interested are denoted, HCM and HTN, alongside data modality types used in this study. Single modal as well as multimodal model architecture were explored. LVH-Fusion is based on a late average fusion neural network, denoted in blue.

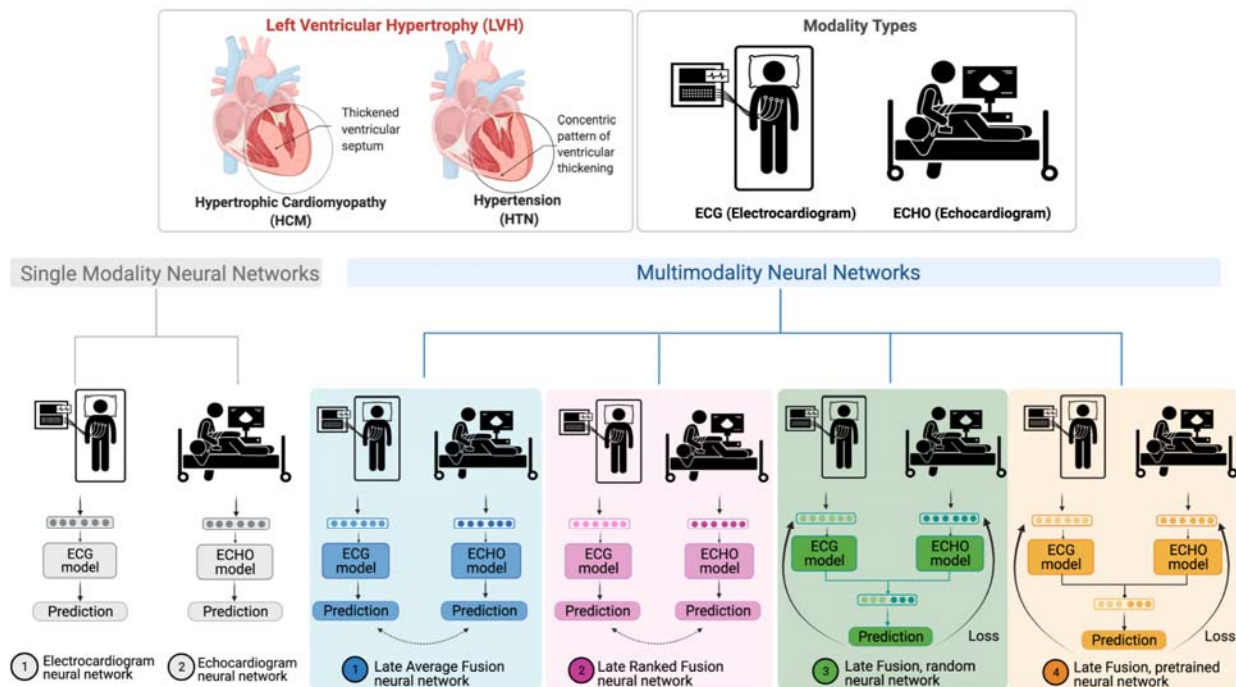

435  
436  
437  
438

439 **Figure 2, Ablation studies impact on LVH-Fusion performance**  
 440 Bootstrap 95% CI for performance metrics, F1-score and average precision score, for each model  
 441 trained on ablated input data. for each prediction metric is shown. (TOP row) Results from  
 442 ablating ECG input. (BOTTOM row) Results from ablating echocardiogram input. For each  
 443 ablation setting, a separate model was trained on that type of ablated data to quantify the  
 444 information content in the data.  
 445

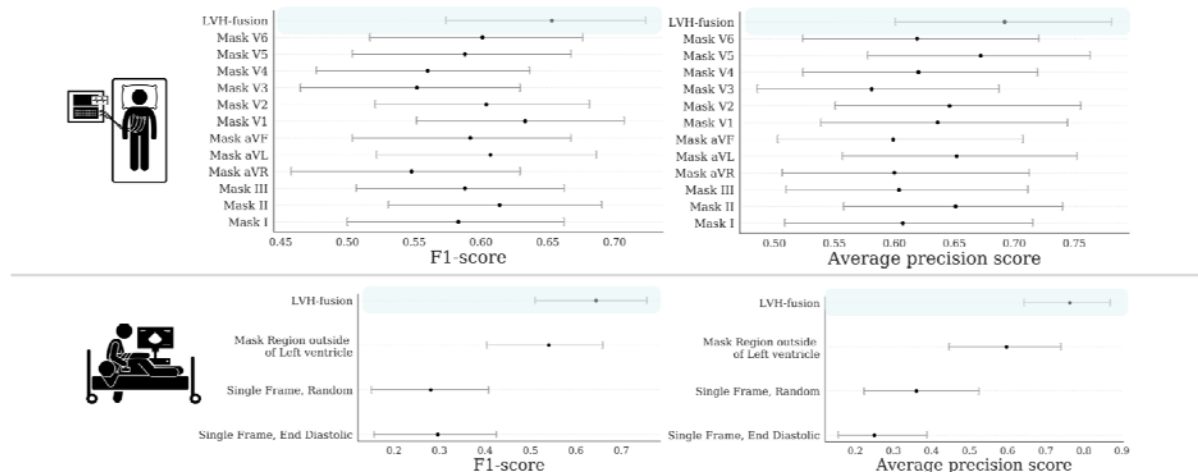

446  
 447  
 448

449 **Figure 3, LVH-Fusion ECG interpretations.**  
450 SHAP explanations of one true positive, HCM sample (A). Red areas indicate timesteps that hold  
451 a positive impact on prediction, while blue timesteps indicate a negative impact on prediction, no  
452 color is neutral. (B) Selected regions of ECG leads denote timesteps of high estimated  
453 importance, focusing on inverted T-waves and lead V3 R peaks. (C) Local explanations of the  
454 cumulative SHAP values on prediction output across leads. Lead V3 overall contains the highest  
455 values of SHAP values for this sample presented.  
456  
457

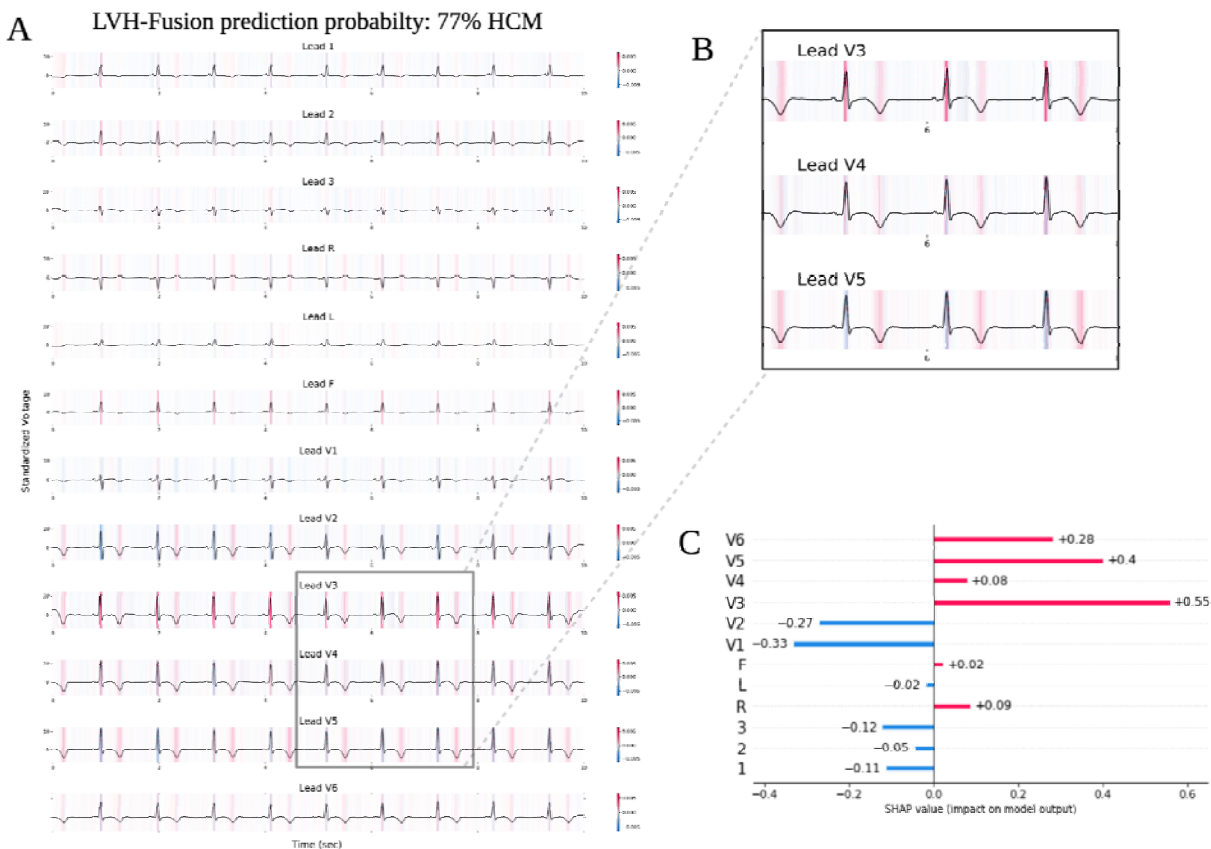

458  
459

460 **Figure 4, LVH-Fusion echocardiogram interpretations.**  
461 SHAP explanations for two true positive samples, HCM (top row) and HTN (bottom row). Each  
462 class has 3 frames selected with SHAP values overlaid. Red areas indicate pixels that hold a  
463 positive impact on prediction, while blue pixels indicate a negative impact on prediction, no  
464 color is neutral. We observe red areas of importance converging on the asymmetric septal wall in  
465 the HCM example.  
466

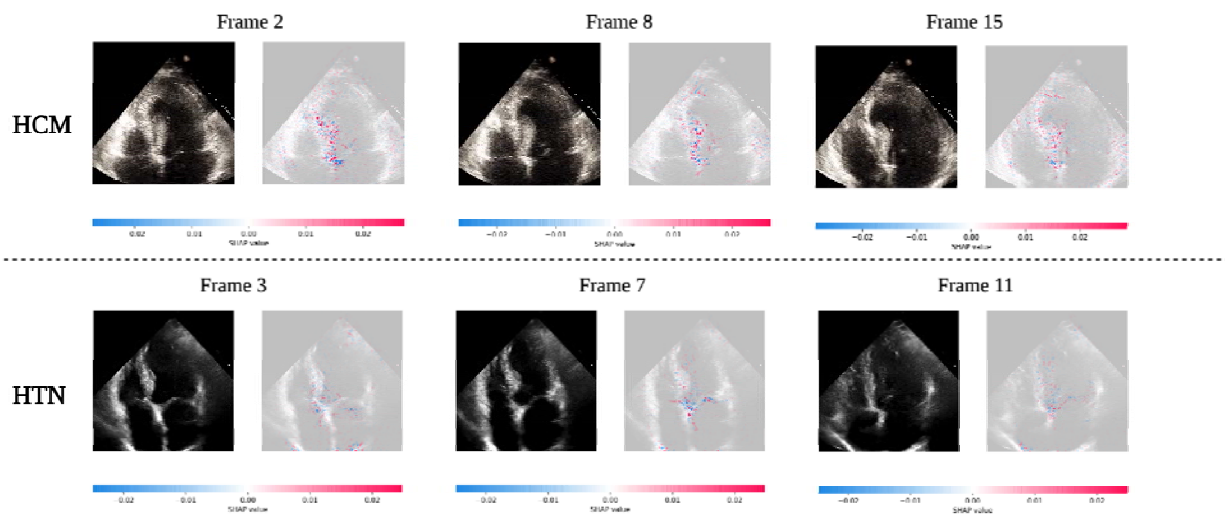

467  
468  
469

470  
471  
472

## TABLES

**Table 1 Breakdown of data by partition**

| Label | Partition | Number of unique Echo patients | Number of Echos | Number of unique ECG patients | Number of ECGs |
|-------|-----------|--------------------------------|-----------------|-------------------------------|----------------|
| HCM   | Train     | 256                            | 596             | 662                           | 4,281          |
|       | Validate  | 31                             | 58              | 71                            | 424            |
|       | Test      | 27                             | 88              | 78                            | 380            |
| HTN   | Train     | 1,469                          | 1,976           | 1,535                         | 8,348          |
|       | Validate  | 186                            | 270             | 191                           | 1,127          |
|       | Test      | 181                            | 246             | 191                           | 1,201          |

473  
474

**Table 2: Model performance metrics**

| Models                       | auROC                 | auPRC                 | F1-score                     | Sensitivity           | Specificity                  | Precision             | NPV                   | FPR                   | FNR                   | FDR                   |
|------------------------------|-----------------------|-----------------------|------------------------------|-----------------------|------------------------------|-----------------------|-----------------------|-----------------------|-----------------------|-----------------------|
| Late averaged fusion         | 0.914 (0.858 - 0.961) | 0.781 (0.642 - 0.898) | <b>0.711 (0.571 - 0.826)</b> | 0.727 (0.560 - 0.880) | <b>0.952 (0.921 - 0.979)</b> | 0.696 (0.526 - 0.850) | 0.959 (0.930 - 0.986) | 0.048 (0.021 - 0.078) | 0.273 (0.118 - 0.438) | 0.304 (0.148 - 0.467) |
| Late ranked fusion           | 0.917 (0.866 - 0.960) | 0.758 (0.621 - 0.874) | 0.480 (0.353 - 0.591)        | 0.818 (0.667 - 0.950) | 0.760 (0.701 - 0.818)        | 0.340 (0.235 - 0.449) | 0.965 (0.935 - 0.991) | 0.240 (0.182 - 0.299) | 0.182 (0.050 - 0.333) | 0.660 (0.552 - 0.766) |
| Late fusion random           | 0.890 (0.832 - 0.941) | 0.643 (0.475 - 0.803) | 0.556 (0.409 - 0.681)        | 0.682 (0.500 - 0.842) | 0.884 (0.838 - 0.925)        | 0.469 (0.323 - 0.621) | 0.949 (0.915 - 0.978) | 0.116 (0.075 - 0.162) | 0.318 (0.156 - 0.500) | 0.531 (0.382 - 0.679) |
| Late fusion pretrained       | 0.891 (0.829 - 0.943) | 0.625 (0.460 - 0.784) | 0.452 (0.333 - 0.556)        | 0.864 (0.731 - 0.967) | 0.705 (0.642 - 0.767)        | 0.306 (0.210 - 0.403) | 0.972 (0.943 - 1.000) | 0.295 (0.234 - 0.359) | 0.136 (0.033 - 0.269) | 0.694 (0.596 - 0.787) |
| Single modal: ECG            | 0.834 (0.784 - 0.880) | 0.686 (0.590 - 0.776) | 0.639 (0.555 - 0.712)        | 0.676 (0.580 - 0.770) | 0.831 (0.786 - 0.877)        | 0.605 (0.512 - 0.696) | 0.871 (0.828 - 0.912) | 0.169 (0.123 - 0.216) | 0.324 (0.231 - 0.418) | 0.395 (0.304 - 0.488) |
| Single modal: Echocardiogram | 0.889 (0.828 - 0.942) | 0.719 (0.588 - 0.833) | 0.625 (0.500 - 0.735)        | 0.741 (0.591 - 0.875) | 0.906 (0.870 - 0.940)        | 0.541 (0.406 - 0.676) | 0.959 (0.932 - 0.982) | 0.094 (0.060 - 0.130) | 0.259 (0.125 - 0.407) | 0.459 (0.324 - 0.595) |

477 **SUPPLEMENTAL TABLES AND FIGURES**

478

479

**Supplemental Table S1**

| <b>Data Selection</b>                  | <b>Label</b> | <b>Number of unique Echo patients</b> | <b>Number of Echos</b> | <b>Number of unique ECG patients</b> | <b>Number of ECGs</b> |
|----------------------------------------|--------------|---------------------------------------|------------------------|--------------------------------------|-----------------------|
| First Encounters, train, val, and test | HCM          | 314                                   | 314                    | 811                                  | 811                   |
|                                        | HTN          | 1,836                                 | 1,836                  | 1,917                                | 1,917                 |
| First Encounter, val and test          | HCM          | 314                                   | 654                    | 811                                  | 4,430                 |
|                                        | HTN          | 1,836                                 | 2,343                  | 1,917                                | 8,730                 |
| All Encounters train, val, and test    | HCM          | 324                                   | 763                    | 917                                  | 6,027                 |
|                                        | HTN          | 1,848                                 | 2,516                  | 1,977                                | 13,045                |

480

481

482

**Supplemental Table S2**

| <b>Model</b>     | <b>Loss</b> | <b>auPRC</b> | <b>Optim</b> | <b>Batch</b> | <b>Data Selection</b>               |
|------------------|-------------|--------------|--------------|--------------|-------------------------------------|
| VGG11            | 0.502       | 0.591        | adam         | 75           | First Encounters, all               |
| VGG13            | 0.448       | 0.672        | adam         | 64           | First Encounters, all               |
| VGG16            | 0.493       | 0.559        | adam         | 64           | First Encounters, all               |
| VGG19            | 0.501       | 0.559        | adam         | 64           | First Encounters, all               |
| densenet121      | 0.395       | 0.738        | adam         | 64           | First Encounters, all               |
| densenet161      | 0.449       | 0.639        | adam         | 64           | First Encounters, all               |
| densenet169      | 0.41        | 0.722        | adam         | 75           | First Encounters, val and test only |
| densenet201      | 0.433       | 0.724        | adam         | 64           | First Encounters, all               |
| resnet101        | 0.427       | 0.702        | adam         | 75           | First Encounters, all               |
| resnet152        | 0.434       | 0.715        | adam         | 64           | First Encounters, all               |
| resnet18         | 0.405       | 0.727        | adam         | 64           | First Encounters, all               |
| resnet34         | 0.383       | 0.781        | adam         | 64           | First Encounters, all               |
| resnet50         | 0.429       | 0.73         | adam         | 75           | First Encounters, all               |
| resnext101_32x8d | 0.405       | 0.741        | adam         | 75           | First Encounters, all               |
| resnext50_32x4d  | 0.405       | 0.734        | adam         | 64           | First Encounters, all               |
| wide_resnet101_2 | 0.426       | 0.69         | adam         | 75           | First Encounters, all               |
| wide_resnet50_2  | 0.416       | 0.692        | adam         | 64           | First Encounters, all               |

483

484



485

**Supplemental Table S3**

| <b>Model</b> | <b>loss</b> | <b>auPRC</b> | <b>optim</b> | <b>frames</b> | <b>period</b> | <b>File selection</b> |
|--------------|-------------|--------------|--------------|---------------|---------------|-----------------------|
| mc3          | 0.134       | 0.893        | adam         | 16            | 2             | First Encounters, all |
| r2plus1d     | 0.171       | 0.851        | adam         | 16            | 4             | First Encounters, all |
| r3d          | 0.152       | 0.879        | adam         | 16            | 4             | First Encounters, all |

486

**Supplemental Table S4**

|                       | <b>auROC</b> | <b>auPRC</b> | <b>F1score</b> | <b>Sensitivity</b> | <b>Specificity</b> | <b>PPV</b> | <b>NPV</b> | <b>FPR</b> | <b>FNR</b> | <b>FDR</b> |
|-----------------------|--------------|--------------|----------------|--------------------|--------------------|------------|------------|------------|------------|------------|
| Reduced features (11) | 0.71         | 0.59         | 0.5            | 0.43               | 0.89               | 0.6        | 0.8        | 0.11       | 0.57       | 0.4        |
| Large features (468)  | 0.84         | 0.73         | 0.59           | 0.47               | 0.95               | 0.78       | 0.82       | 0.05       | 0.53       | 0.22       |

487

488

489

Supplemental Table S5

|              | f1-score | precision | recall | support |
|--------------|----------|-----------|--------|---------|
| HTN          | 0.71     | 0.78      | 0.65   | 181     |
| HCM          | 0.41     | 1.00      | 0.26   | 27      |
| NORMAL EF    | 0.95     | 0.92      | 0.97   | 876     |
| macro avg    | 0.69     | 0.90      | 0.63   | 1084    |
| weighted avg | 0.89     | 0.90      | 0.90   | 1084    |

490

491

492

493

Supplemental Table S6

|              | f1-score | precision | recall | support |
|--------------|----------|-----------|--------|---------|
| HTN          | 0.39     | 0.35      | 0.44   | 178     |
| HCM          | 0.36     | 0.26      | 0.57   | 68      |
| SINUS        | 0.91     | 0.95      | 0.88   | 1789    |
| macro avg    | 0.56     | 0.52      | 0.63   | 2035    |
| weighted avg | 0.85     | 0.87      | 0.83   | 2035    |

494

495

496  
497  
498  
499

### Supplemental Figure S1, Additional examples of true positive HCM ECGs

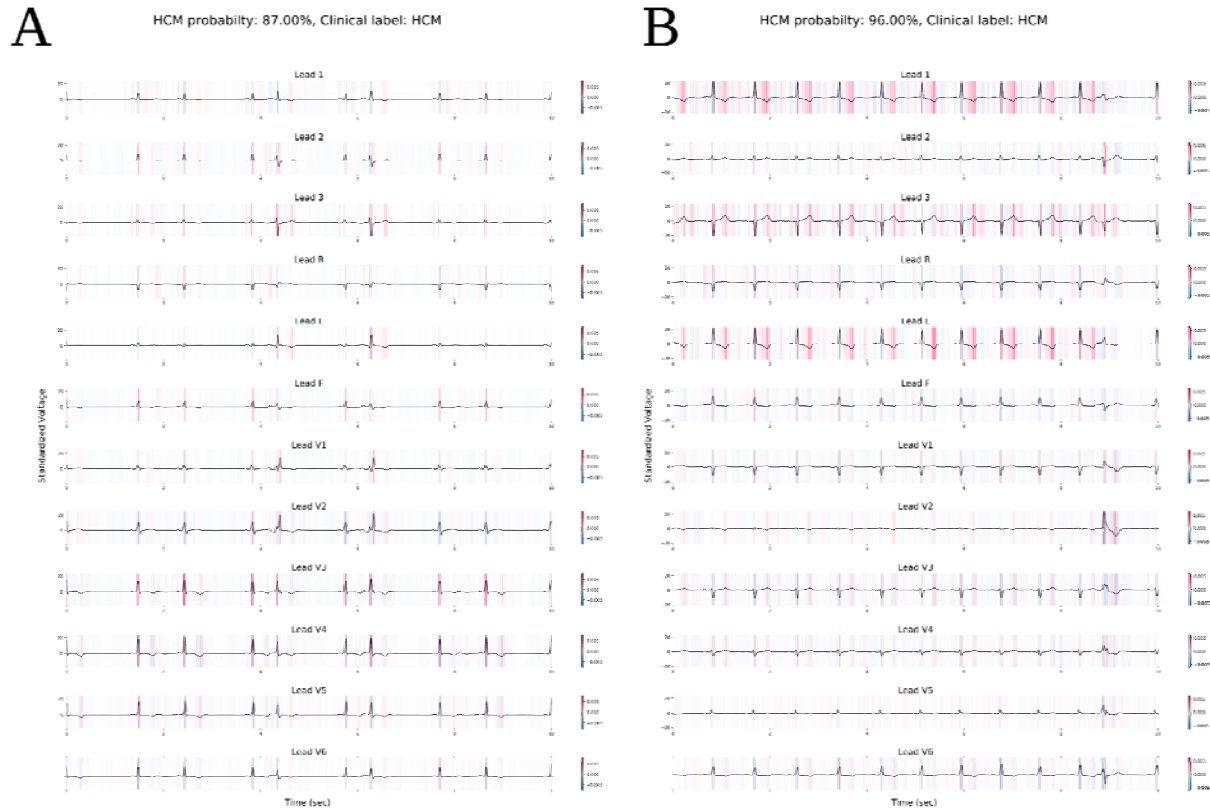

500  
501

502 **Supplemental Figure S2, ECG ablation study of multiple lead masking**

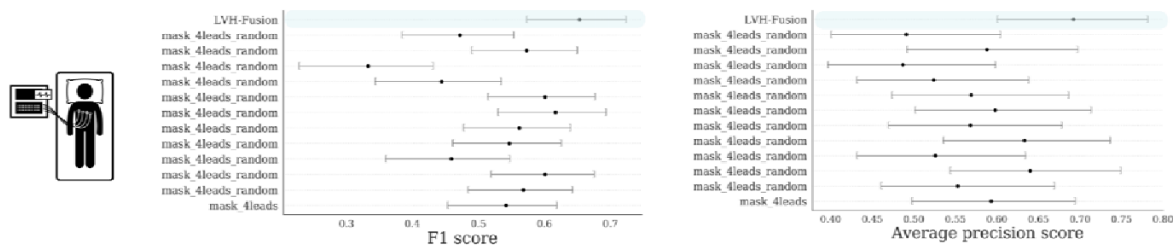

503 **Supplemental Figure S3, Echo SHAP local feature importance plot**  
504

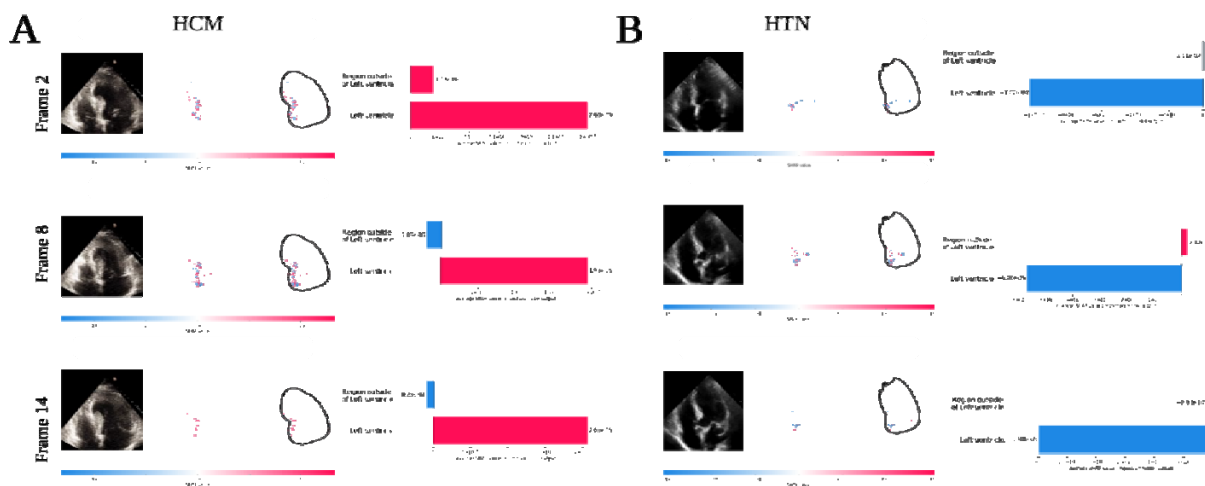

505  
506  
507

508 **Supplemental Figure S4, ECG SHAP global feature importance plot**

509 The global importance of each lead is taken to be the mean absolute value summation for each  
510 lead over all the given samples. Hypertension (HTN) is in solid red, Hypertrophic  
511 Cardiomyopathy (HCM) is denoted by stripes. Lead V3 is ranks highest overall in global feature  
512 importance.  
513

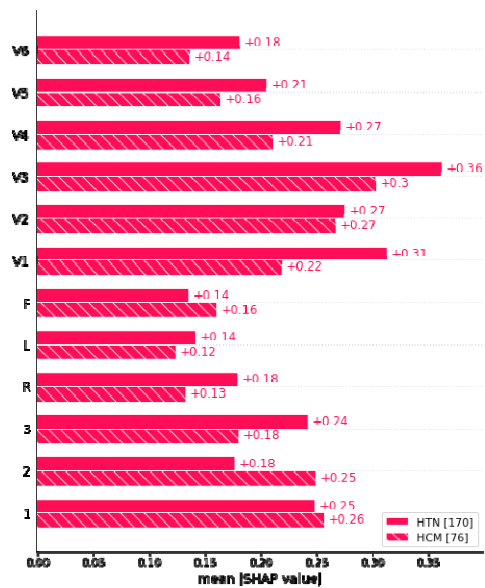

514  
515
